# Supplementary material for: Highly efficient exciton harvesting and charge transport in ternary blend solar cells based on wide- and low-bandgap polymers
Source: Royal Society of Chemistry journal article supplement (doi:10.1039/c5cp05161d), 2015-01-01
Supplement: c5cp05161d1.pdf [file c5cp05161d1.pdf]

Electronic Supplementary Information (ESI) available:

## **Highly efficient exciton harvesting and charge transport in ternary blend solar cells based on wide- and low-bandgap polymers**

Yanbin Wang,<sup>a,b</sup> Hideo Ohkita,<sup>\*,a,c</sup> Hiroaki Benten,<sup>a</sup> and Shinzaburo Ito<sup>a</sup>

<sup>a</sup> Department of Polymer Chemistry, Graduate School of Engineering, Kyoto University, Katsura, Nishikyo, Kyoto 615-8510, Japan.

<sup>b</sup> Present address: School of Materials Science and Engineering, Changzhou University, Changzhou 213164, PR China.

<sup>c</sup> Japan Science and Technology Agency (JST), PRESTO, 4-1-8 Honcho Kawaguchi, Saitama 332-0012, Japan.

E-mail: ohkita@photo.polym.kyoto-u.ac.jp

### Photoemission yield spectra

Figure S1 shows the photoemission yield spectra of P3HT, PSBTBT, and PCBM neat films. The HOMO energy levels of these materials were estimated from a threshold energy of the cubic root of the photoelectron yield. The LUMO energy levels of polymers were estimated from the HOMO energy levels and the optical bandgap energy that was evaluated from the crossing point of the absorption and PL spectra. The LUMO energy level of PCBM was taken from the literature.<sup>S1</sup>

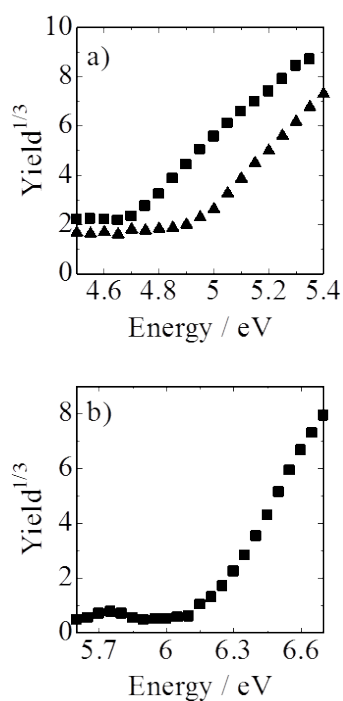

**Figure S1.** Photoemission yield spectra of a) P3HT (squares) and PSBTBT (triangles), and b) PCBM (squares). The cut-off energy was estimated from a threshold energy of the cubic root of the photoelectron yield.

## Absorption and PL spectra

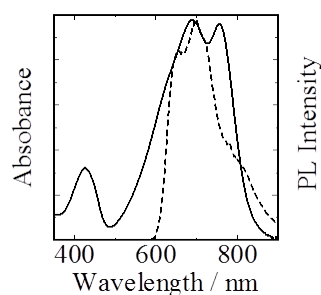

**Figure S2.** Absorption and PL spectra of PSBTBT (solid line) and P3HT (broken line) films, respectively. The excitation wavelength was 550 nm.

## Photovoltaic parameters

**Table S1.** Photovoltaic parameters of P3HT-L/PSBTBT/PCBM ternary solar cells.

| P3HT : PSBTBT : PCBM | $J_{SC} / \text{mA cm}^{-2}$ | $V_{OC} / \text{V}$ | FF   | PCE / % |
|----------------------|------------------------------|---------------------|------|---------|
| 50 : 0 : 50          | 6.67                         | 0.62                | 0.57 | 2.4     |
| 40 : 10 : 50         | 6.82                         | 0.62                | 0.55 | 2.3     |
| 30 : 20 : 50         | 6.83                         | 0.64                | 0.46 | 2.0     |
| 20 : 30 : 50         | 7.52                         | 0.66                | 0.45 | 2.2     |
| 10 : 40 : 50         | 8.09                         | 0.67                | 0.51 | 2.8     |
| 0 : 50 : 50          | 13.4                         | 0.65                | 0.56 | 4.9     |

**Table S2.** Photovoltaic parameters of P3HT-H/PSBTBT/PCBM ternary solar cells.

| P3HT : PSBTBT : PCBM | $J_{SC} / \text{mA cm}^{-2}$ | $V_{OC} / \text{V}$ | FF   | PCE / % |
|----------------------|------------------------------|---------------------|------|---------|
| 50 : 0 : 50          | 8.61                         | 0.54                | 0.68 | 3.2     |
| 40 : 10 : 50         | 10.4                         | 0.54                | 0.68 | 3.8     |
| 30 : 20 : 50         | 12.3                         | 0.56                | 0.66 | 4.5     |
| 20 : 30 : 50         | 15.8                         | 0.58                | 0.61 | 5.6     |
| 10 : 40 : 50         | 15.1                         | 0.61                | 0.53 | 4.9     |
| 0 : 50 : 50          | 13.3                         | 0.62                | 0.57 | 4.7     |

## Reference

S1) H. Yoshida, *J. Phys. Chem. C*, 2014, **118**, 24377–24382.
